# Supplementary material for: Plasmon-enhanced water splitting on TiO2-passivated GaP photocatalysts
Source: Royal Society of Chemistry journal article supplement (doi:10.1039/c3cp54674h), 2013-12-20
Supplement: c3cp54674h.pdf [file c3cp54674h.pdf]

## Plasmon-Enhanced Water Splitting on TiO<sub>2</sub>-Passivated GaP Photocatalysts

Jing Qiu<sup>a</sup>, Guangtong Zeng<sup>b</sup>, Prathamesh Pavaskar<sup>c</sup>, Zhen Li<sup>c</sup>, and Stephen B. Cronin<sup>bc\*</sup>

<sup>a</sup>Department of Materials Science, University of Southern California, Los Angeles, California 90089, USA

<sup>b</sup>Department of Electrical Engineering, University of Southern California, Los Angeles, California 90089, USA

<sup>c</sup>Department of Chemistry, University of Southern California, Los Angeles, California 90089, USA

### Supporting Information

#### 1. Distinguish the plasmonic effect from the co-catalyst effect of Au

Noble metals, such as Pt, Au, and Ru, serve as electron-trapping co-catalysts to facilitate charge separation and enhance chemical reactions. To distinguish the plasmonic effect from the co-catalyst effect, we replace Au with Pt. As shown in Figure S1, the co-catalyst effect is not significant when the applied voltage is not more negative than -1.0V vs. Ref (Ag/AgCl).

Therefore, we claim the Au as a co-catalyst is not the determining factor in our case.

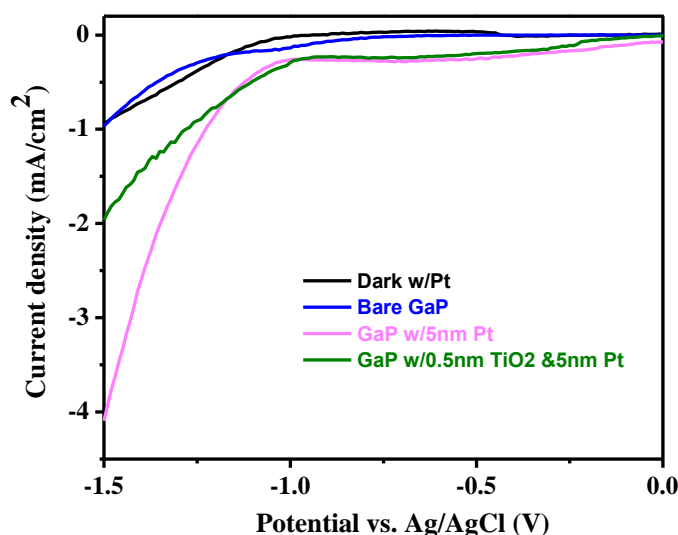

**Figure S1.** Photocurrent plotted as a function of voltage for GaP photocatalysts with Pt nanoparticles with and without TiO<sub>2</sub> under 1W/cm<sup>2</sup> 532nm illumination in a 0.5M Na<sub>2</sub>SO<sub>4</sub> solution.

## 2. SEM images

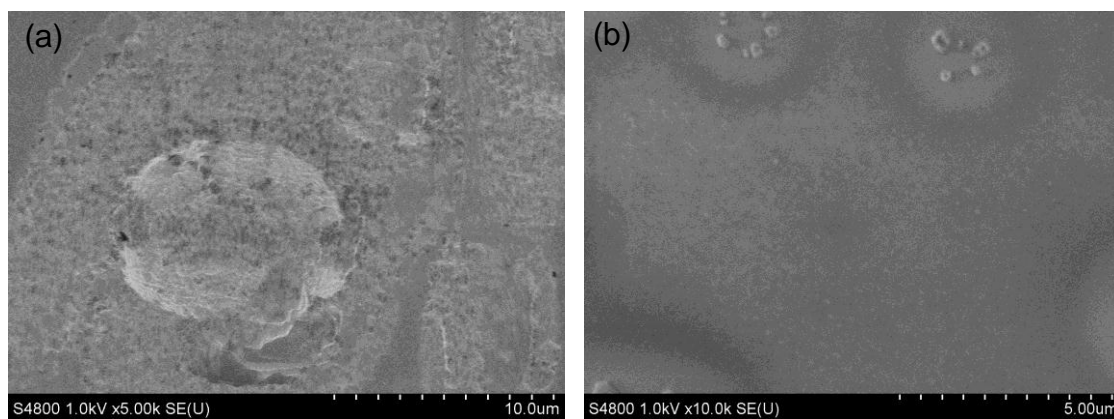

**Figure S2.** SEM image of bare GaP (a) and TiO<sub>2</sub> passivated GaP (b) after 12 hour reaction.
